# Supplementary material for: Extracellular matrix derived from human urine-derived stem cells enhances the expansion, adhesion, spreading, and differentiation of human periodontal ligament stem cells
Source: PubMed Central journal article supplement (PMC6921428; doi:10.1186/s13287-019-1483-7), 2019-12-18

GAPDH PPAR $\gamma$  LPL CD31 VEGF POSTN OCN RUNX2 ALP

50bp

300bp

600bp

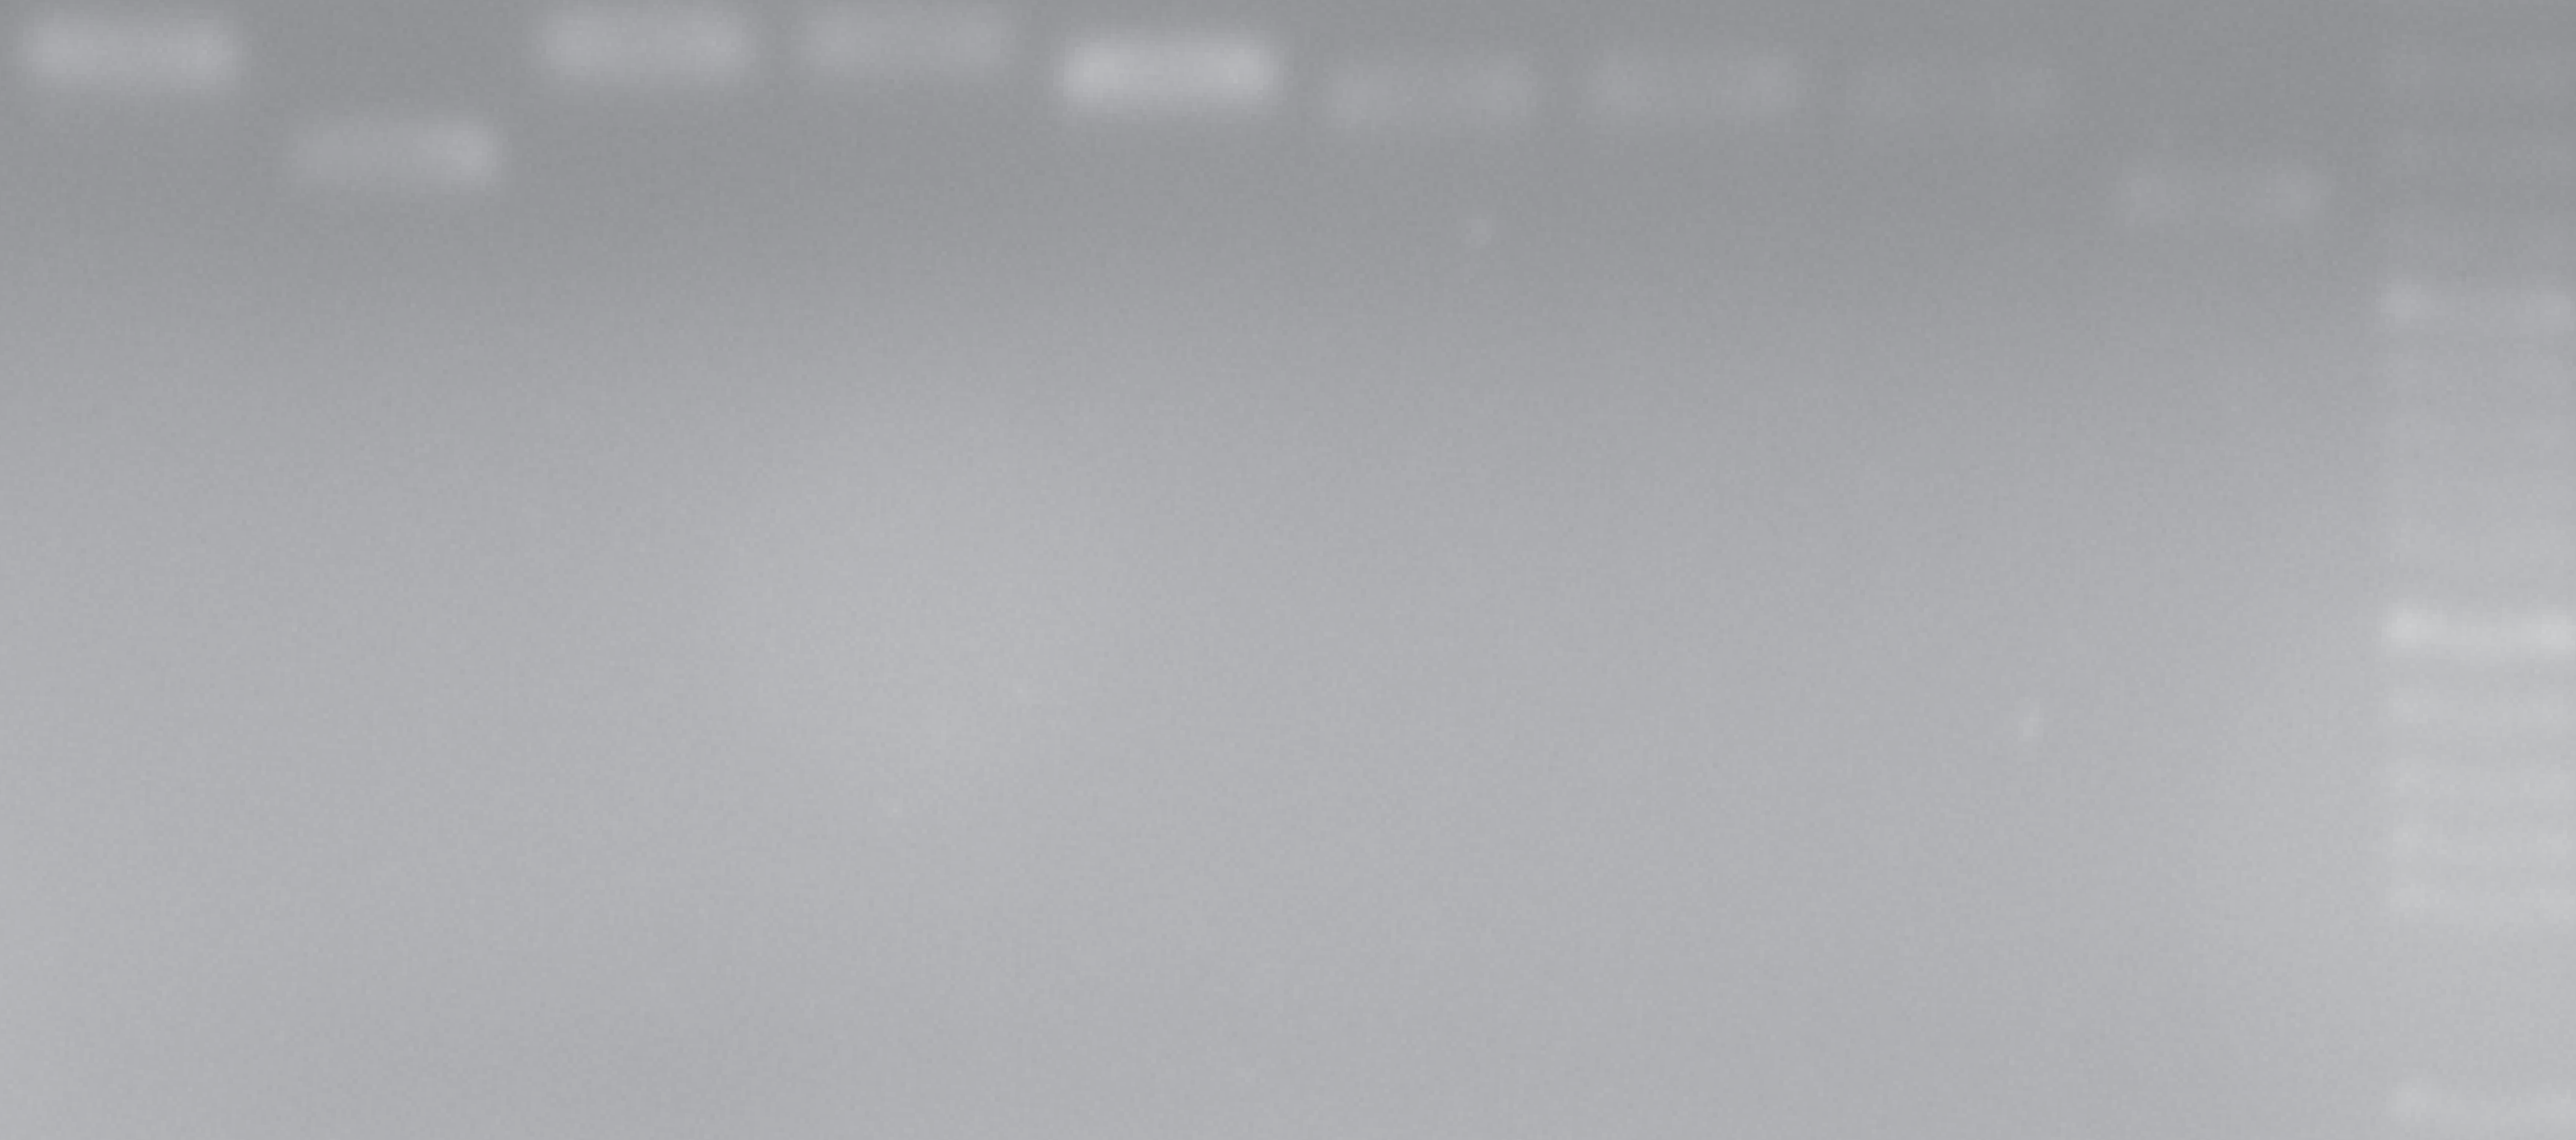

Supplement: 13287_2019_1483_MOESM1_ESM.pdf [file 13287_2019_1483_MOESM1_ESM.pdf]
