# Supplementary material for: Extracellular matrix derived from human urine-derived stem cells enhances the expansion, adhesion, spreading, and differentiation of human periodontal ligament stem cells
Source: PubMed Central journal article supplement (PMC6921428; doi:10.1186/s13287-019-1483-7), 2019-12-18

# hUSCs

# hPDLSCs

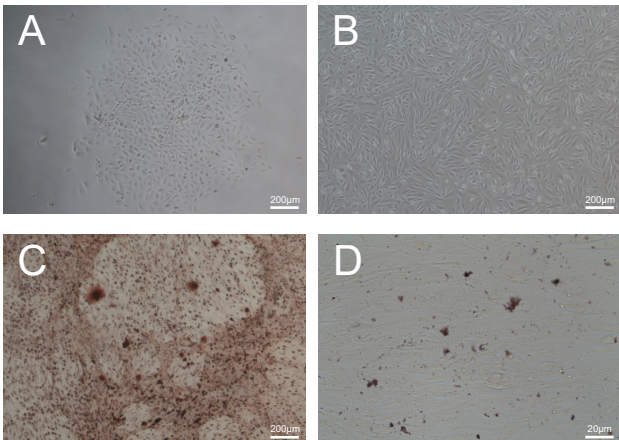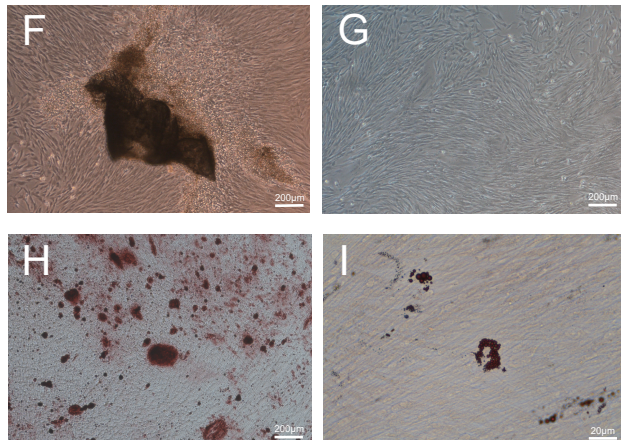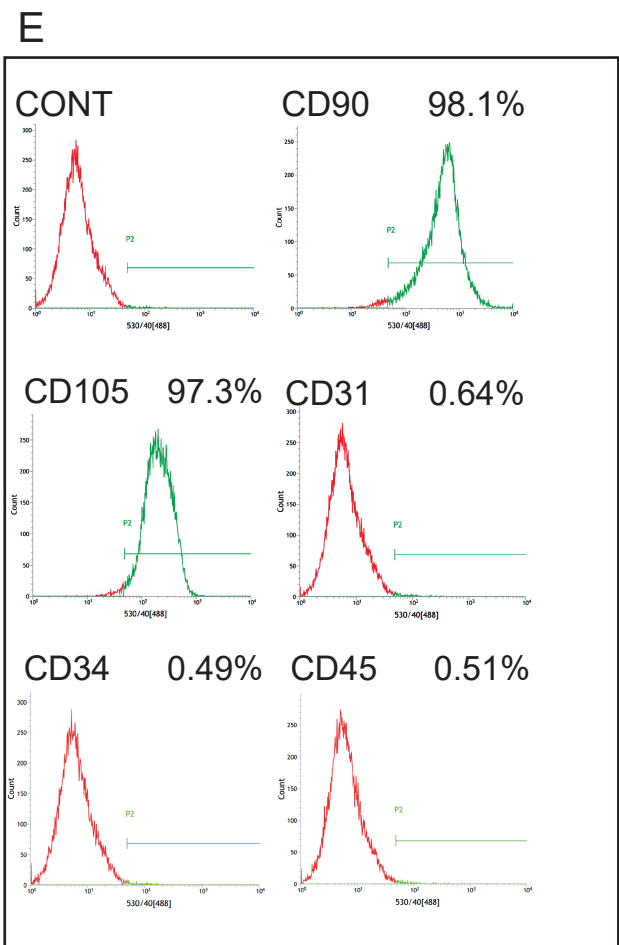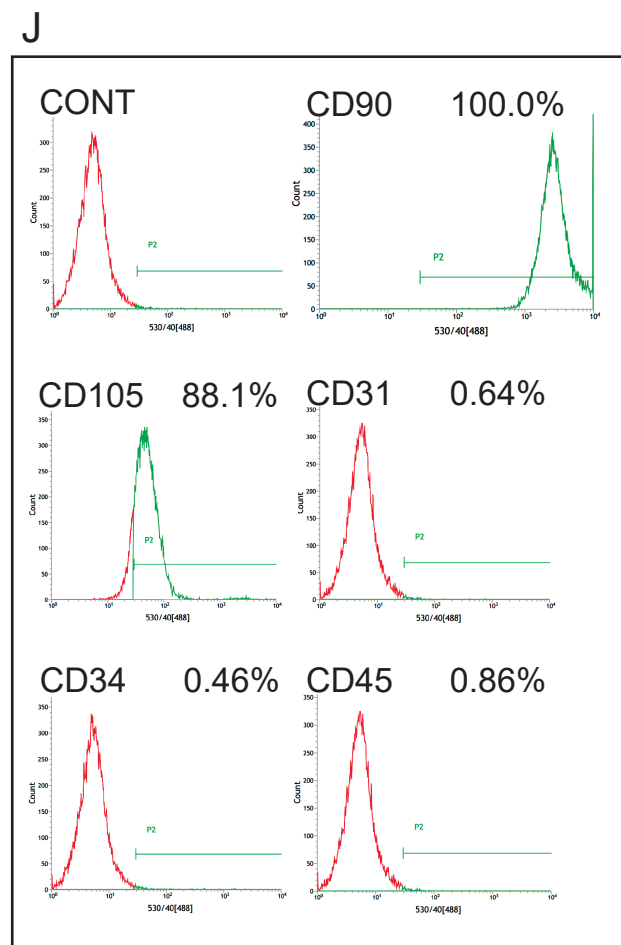

B

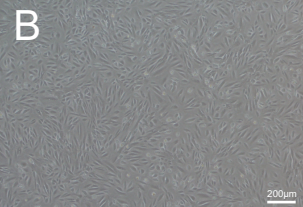

A

200µm

A phase-contrast micrograph showing a large, dense, circular cluster of cells. The cells are small and spindle-shaped, typical of fibroblasts or epithelial cells in culture. The cluster is centered in the frame. In the bottom right corner, there is a white scale bar labeled '200µm'. The letter 'A' is in the top left corner.

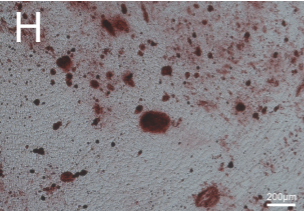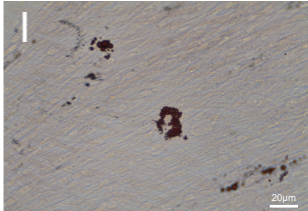

Supplement: 13287_2019_1483_MOESM3_ESM.pdf [file 13287_2019_1483_MOESM3_ESM.pdf]
